# Supplementary material
Source: PubMed Central journal article supplement (PMC5215726)
Supplement: NIHMS808255-supplement-1.pdf [file NIHMS808255-supplement-1.pdf]

### *Supplemental data: Methods*

*Salivary peptide measurement.* A final set of two scheduled MRM instrument methods including the isotopically labeled standards and encompassing a 10 minute window around the retention time of each peptides was performed using a 40 mm by 0.1 mm (Jupiter 5 micron, 300A) kasil fritted trap followed by a 200 mm by 0.1 mm (Jupiter 3 micron, 300A), self-packed analytical column coupled directly to an TSQ-Vantage (Thermo Fisher) via a nanoelectrospray source. Peptides were resolved using an aqueous to organic gradient flowing at 400 nl/min. Q1 peak width resolution was set to 0.7, collision gas pressure was 1 mTorr, and utilized an EZmethod cycle time of 3 seconds. For each run, saliva samples were prepared by precipitating the entire sample from each patient time point by addition of 1/3 volume of 100 percent w/v trichloroacetic acid (TCA). Pellets were washed twice ice cold acetone, dried briefly, were then resuspended with labeled peptides in 8 M urea 100 mM tris pH 8.5, reduced using TCEP [(tris(2-carboxyethyl)phosphine)], and then alkylated using iodoacetamide. They were then diluted back to 2 M urea and digested overnight with trypsin. Prior to injection, samples were subjected to C18 solid phase extraction cleanup and resuspended in a final volume of 20 µl of 0.1% formic acid. Four microliters of sample was loaded via autosampler and analyzed. The resulting RAW instrument files were imported into Skyline for peak-picking and quantitation.

### *16S rRNA amplicon sequencing of bacterial DNA.*

The complete sequences of the primers were:

8F - 5' TCGTCGGCAGCGTCAGATGTGTATAAGAGACAGAGAGTTTGATCCTGGCTCAG3'

BifidoF-5' TCGTCGGCAGCGTCAGATGTGTATAAGAGACAGAGGGTTCGATTCTGGCTCAG3'

338R - 5' GTCTCGTGGGCTCGGAGATGTGTATAAGAGACAGGCTGCCTCCCGTAGGAGT3'

The thermal profile for the amplification of each sample had an initial denaturing step at 95°C for 3 minutes, followed by a cycling of denaturing of 95°C for 30 seconds, annealing at 55°C for 30 seconds and a 30 second extension at 72°C (25 cycles), a 5 minutes extension at 72°C and a final hold at 4°C. Each 16S amplicon was purified using the AMPure XP reagent (Beckman Coulter, Indianapolis, IN). In the next step, each sample was amplified using a limited cycle PCR program, adding Illumina sequencing adapters and dual-index barcodes (index 1(i7) and index 2(i5)) (Illumina, San Diego, CA) to the amplicon target. The thermal profile for the amplification of each sample had an initial denaturing step at 95°C for 3 minutes, followed by a denaturing cycle of 95°C for 30 seconds, annealing at 55°C for 30 seconds and a 30 second extension at 72°C (8 cycles), a 5 minute extension at 72°C and a final hold at 4°C. The final libraries were again purified using the AMPure XP reagent (Beckman Coulter), quantified and normalized prior to pooling. The DNA library pool was then denatured with NaOH, diluted with hybridization buffer and heat denatured before loading on the MiSeq reagent cartridge (Illumina) and on the MiSeq instrument (Illumina). Automated cluster generation and paired-end sequencing with dual reads were performed according to the manufacturer's instructions.

# Supplemental Figure 1.

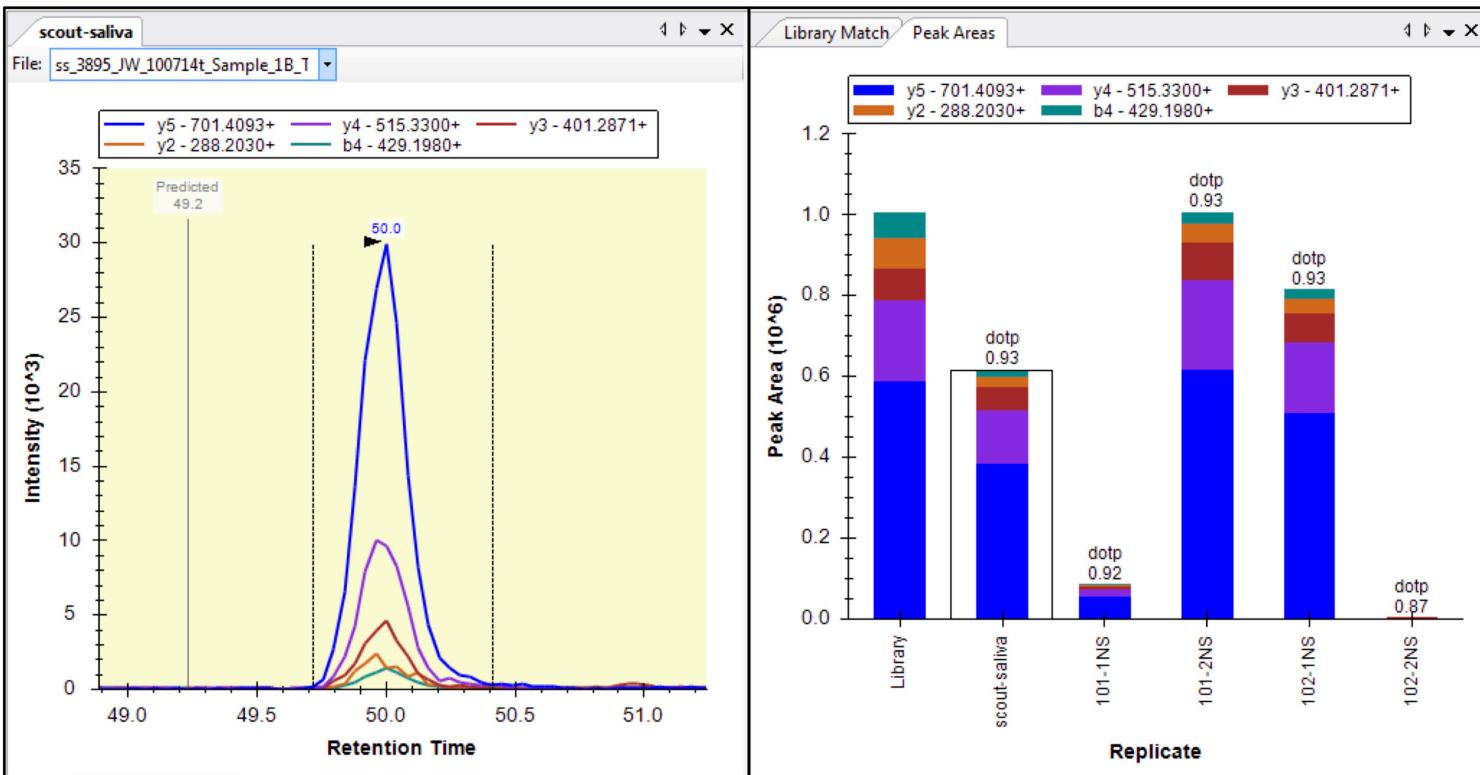



Supplemental Figure 3.

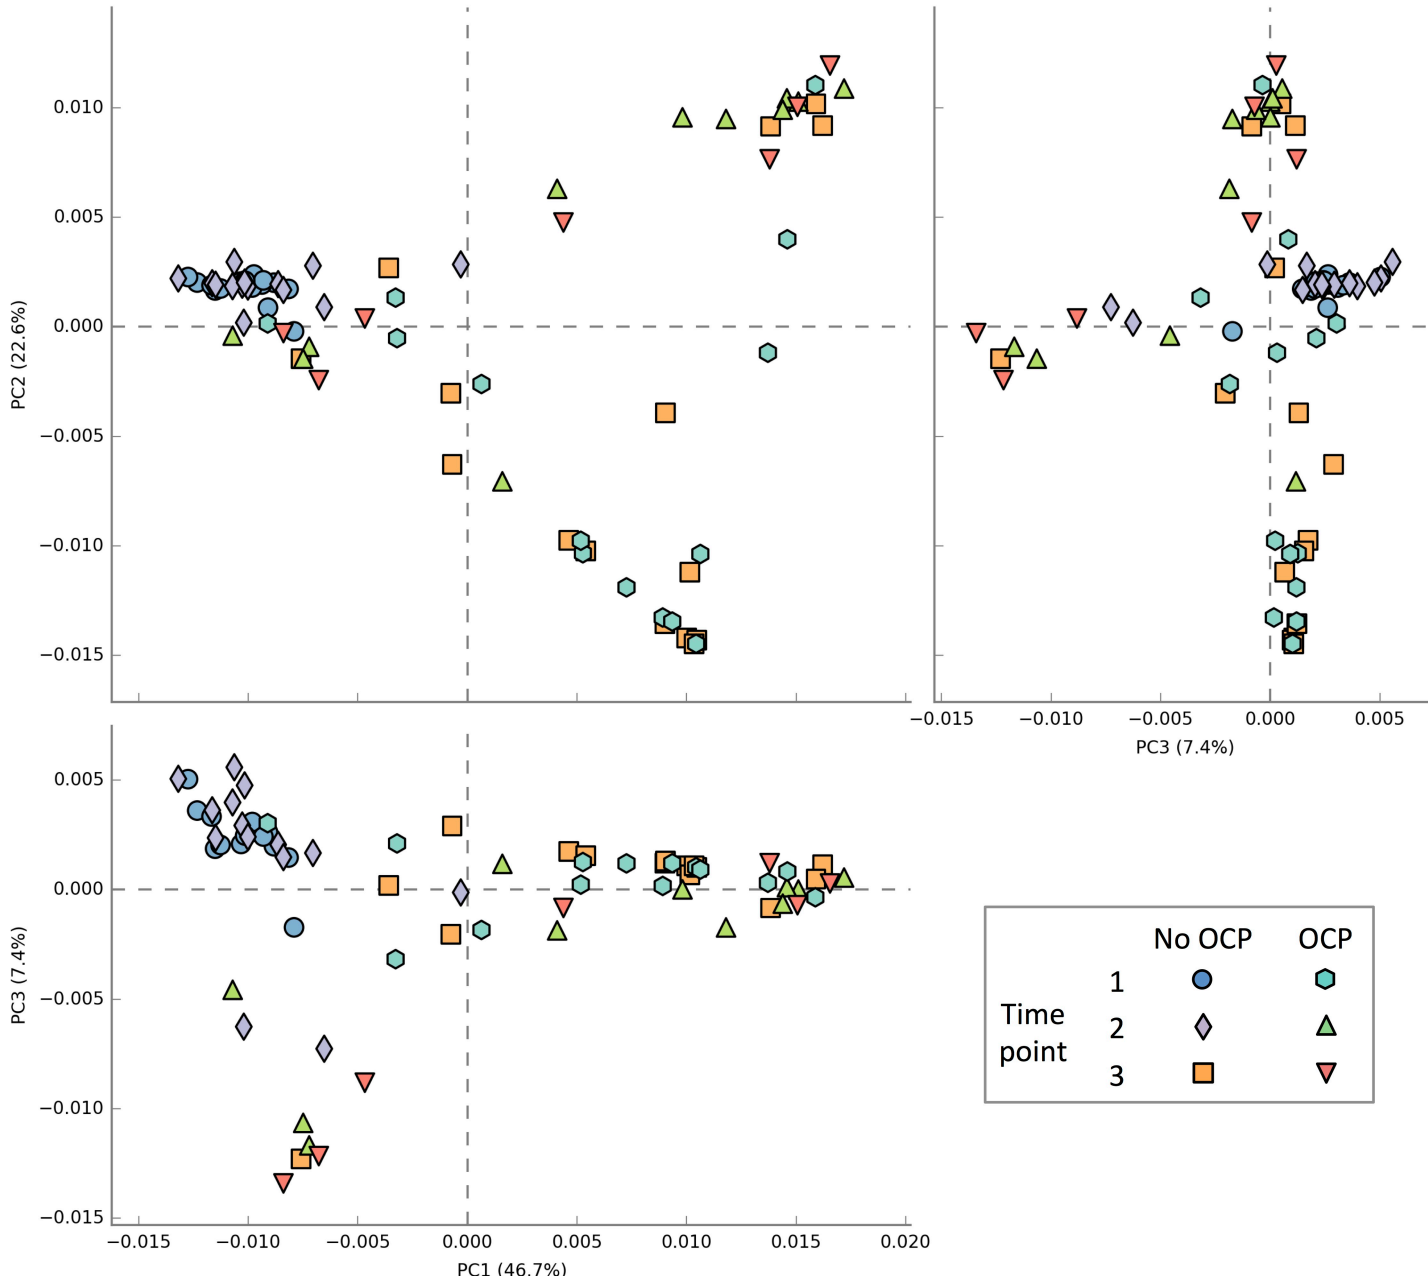

Supplemental Table 1. Maternal and neonatal characteristics with peptide data

|                                                        | No OCP          | OCP               | P-value                  |
|--------------------------------------------------------|-----------------|-------------------|--------------------------|
| <b>Maternal Characteristics</b>                        | <b>N = 35</b>   | <b>N = 30</b>     |                          |
| Age, median (quartiles)                                | 25 (21, 30)     | 24 (21, 29)       | 0.79 <sup>1</sup>        |
| Race                                                   |                 |                   |                          |
| African American                                       | 26%             | 43%               | 0.4 <sup>2</sup>         |
| White                                                  | 66%             | 53%               |                          |
| More than one                                          | 6%              | 3%                |                          |
| Unknown, not reported                                  | 3%              | 0%                |                          |
| Ethnicity                                              |                 |                   | 0.91 <sup>2</sup>        |
| Hispanic or Latino                                     | 14%             | 13%               |                          |
| Parity, median (quartiles)                             | 2 (1, 3)        | 1 (1, 2)          | 0.2 <sup>1</sup>         |
| Gestation (multiple)                                   | 17%             | 23%               | 0.53 <sup>2</sup>        |
| Prenatal care                                          | 94%             | 100%              | 0.18 <sup>2</sup>        |
| Mode of delivery                                       |                 |                   | 0.35 <sup>2</sup>        |
| SVD                                                    | 23%             | 33%               |                          |
| Caesarian section                                      | 77%             | 67%               |                          |
| Anesthesia                                             |                 |                   | 0.24 <sup>2</sup>        |
| Epidural                                               | 71%             | 87%               |                          |
| General                                                | 14%             | 3%                |                          |
| Hypertension                                           | 23%             | 37%               | 0.22 <sup>2</sup>        |
| Diabetes                                               | 3%              | 7%                | 0.47 <sup>2</sup>        |
| Tobacco use                                            | 14%             | 23%               | 0.35 <sup>2</sup>        |
| Premature rupture of membranes*                        | 31%             | 20%               | 0.3 <sup>2</sup>         |
| Amniotic fluid                                         |                 |                   | 0.6 <sup>2</sup>         |
| Clear                                                  | 86%             | 90%               |                          |
| Bloody                                                 | 14%             | 10%               |                          |
| Antenatal steroids                                     | 89%             | 83%               | 0.54 <sup>2</sup>        |
| <b>Neonatal characteristics</b>                        |                 |                   |                          |
| Gestational age, median (quartiles)                    | 29 (28, 30)     | 30 (28, 31)       | 0.23 <sup>1</sup>        |
| Birth weight (grams), median (quartiles)               | 1190 (950-1340) | 1298 (1042, 1555) | 0.18 <sup>1</sup>        |
| Male                                                   | 40%             | 50%               | 0.42 <sup>2</sup>        |
| 5 minute Apgar score, median (quartiles)               | 7 (7, 8)        | 7 (6, 8)%         | 0.56 <sup>1</sup>        |
| Surfactant                                             | 51%             | 67%               | 0.21 <sup>2</sup>        |
| Total days intubated                                   | 1 (0, 5)        | 1 (0, 3)          | 0.91 <sup>1</sup>        |
| Early onset bacteremia                                 | 3%              | 0%                | 0.35 <sup>2</sup>        |
| Late onset bacteremia                                  | 9%              | 3%                | 0.38 <sup>2</sup>        |
| Antimicrobial exposure, days, median (quartiles)       | 5 (3, 9)        | 3 (2, 8)          | 0.31 <sup>1</sup>        |
| Age at feeding initiation (days), median (quartiles)   | 2 (2, 2)        | 2 (2, 3)          | 0.77 <sup>1</sup>        |
| Initial feeding type                                   |                 |                   | 0.55 <sup>2</sup>        |
| Expressed breast milk                                  | 69%             | 67%               |                          |
| Donor breast milk                                      | 31%             | 30%               |                          |
| Formula                                                | 0%              | 3%                |                          |
| Days to 100ml/kg/day enteral feeds, median (quartiles) | 11 (10, 19)     | 11 (8, 13)        | 0.2 <sup>1</sup>         |
| Type of feeds at discharge                             |                 |                   | 0.15 <sup>2</sup>        |
| Unfortified breast milk                                | 6%              | 7%                |                          |
| Fortified breast milk                                  | 37%             | 60%               |                          |
| Formula only                                           | 57%             | 33%               |                          |
| Necrotizing enterocolitis (≥stage 2)                   | 3%, n = 1       | 7%, n = 2         | 0.76 <sup>2</sup>        |
| Days to discharge, median (quartiles)                  | 50 (42, 68)     | 38 (30, 61)       | <b>0.008<sup>1</sup></b> |

<sup>1</sup>Wilcoxon rank test; <sup>2</sup>Pearson test, \* >18 hours prior to delivery

*Supplemental Table 2: Peptide sequences*

| <i>Protein target</i>               | <i>Peptide sequence</i> |
|-------------------------------------|-------------------------|
| Osteopontin                         | GDSVVYGLR               |
|                                     | ISHELDSASSEVN           |
| Lysozyme                            | VLHDFGLDGYR             |
|                                     | DLTEWVDGCDF             |
| Lysozyme C                          | WESGYNTR                |
|                                     | STDYGIFQINSR            |
| Immunoglobulin A                    | SAVQGPPEP               |
|                                     | QEPSQGTTFVAVTSILR       |
| Lactoferrin                         | EDAIWNLLR               |
|                                     | FQLFGSPSGQK             |
| Alpha-defensin 1                    | IPACIAGER               |
|                                     | YGTCIQGR                |
| Alpha-defensin 4                    | SSALQVSGSTR             |
| Alpha-defensin 5                    | ESLSGVCEISGR            |
|                                     | QSGEDNQDLAISFAGNLSALR   |
| Alpha defensin 6                    | GANDQDFAVSFAEDASSLR     |
|                                     | AYEADAQEQR              |
| Beta defensin 4                     | SEFELDR                 |
|                                     | ICGYGTAR                |
| Cathelicidin (LL-37)                | FALLGDFFR               |
|                                     | DFLR                    |
|                                     | NLVPR                   |
|                                     | AIDGINQR                |
| Surfactant protein A                | YDSNFQHPK               |
|                                     | LSAESTDER               |
| Mannose-binding lectin              | EEAFLGITDEK             |
|                                     | FFLTNGEIMTFEK           |
| S100A7 (Psoriasin)                  | SIIGMIDMFHK             |
|                                     | GTNYLADVFEK             |
| S100A8 (Calgranulin A)              | ALNSIIDVYHK             |
|                                     | GADVWFK                 |
| S100A9 (Calgranulin B)              | NIETIINTFHQYSVK         |
|                                     | VIEHIMEDLDTNADK         |
| Peptidoglycan recognition protein 3 | YIQPLLLK                |
|                                     | IGSSPSPAALSAEGLISYAIQK  |
| Peptidoglycan recognition protein 4 | GHLSSYVQPLLK            |
|                                     | GYLTPNYLLVGHSDVAR       |
| Polymeric immunoglobulin receptor   | TDISMDFENSR             |
|                                     | IIEGEPNLK               |

Supplemental Table 3. Salivary peptide variations by sample time (percent above detection limit).

|                      | <b>Time 1</b>   | <b>Time 2</b>    | <b>P-value*</b>  |
|----------------------|-----------------|------------------|------------------|
| <b>Peptide</b>       | N = 65          | N = 65           |                  |
| S100a7-S1            | 18 (8-44)       | 17 (8-27)        | 0.13             |
| S100a7-S2            | 40 (5-92)       | 32 (5-70)        | <b>0.049</b>     |
| S100a8-S1            | 102 (40-315)    | 156 (45-395)     | 0.53             |
| S100a8-S2            | 530 (184-1017)  | 533 (243-808)    | 0.29             |
| S100a9-S1            | 1783 (503-3226) | 1886 (744-2911)  | 0.89             |
| S100a9-S2            | 267 (72-441)    | 268 (112-441)    | 0.79             |
| Surfactant protein A | 5 (0-7)         | 5 (0-6)          | 0.42             |
| Alpha defensin 1-S1  | 1 (0-6)         | 1 (0-1)          | 0.39             |
| Alpha defensin 5     | 1 (1-6)         | 1 (0-1)          | <b>&lt;0.001</b> |
| Lactoferrin-S1       | 14 (1-32)       | 34 (1-94)        | <b>0.007</b>     |
| Lactoferrin-S2       | 12 (7-20)       | 23 (13-61)       | <b>&lt;0.001</b> |
| Immunoglobulin A     | 10 (10-124)     | 97 (10-572)      | <b>0.007</b>     |
| Lysozyme C-S1        | 1191 (573-2146) | 1869 (1168-2855) | <b>&lt;0.001</b> |
| Lysozyme C-S2        | 0 (0-12)        | 10 (0-29)        | <b>0.011</b>     |

Median (quartiles), Time 1: 1-2 days of life; Time 2: 8-9 days of life. \*Wilcoxon rank test



Supplemental Table 4. Maternal and neonatal characteristics with microbiota data

|                                                        | No OCP           | OCP              | P-value            |
|--------------------------------------------------------|------------------|------------------|--------------------|
| <b>Maternal Characteristics</b>                        | <b>N = 14</b>    | <b>N = 14</b>    |                    |
| Age, median (quartiles)                                | 28 (23, 31)      | 24 (21, 28)      | 0.14 <sup>1</sup>  |
| Race                                                   |                  |                  |                    |
| African American                                       | 21%              | 43%              | 0.32 <sup>2</sup>  |
| White                                                  | 71%              | 50%              |                    |
| More than one                                          | 0%               | 7%               |                    |
| Unknown, not reported                                  | 7%               | 0%               |                    |
| Ethnicity                                              |                  |                  | 0.54 <sup>2</sup>  |
| Hispanic or Latino                                     | 14%              | 7%               |                    |
| Gestation (multiple)                                   | 7%               | 14%              | 0.54 <sup>2</sup>  |
| Prenatal care                                          | 100%             | 100%             |                    |
| Mode of delivery                                       |                  |                  | 0.62 <sup>2</sup>  |
| SVD                                                    | 14%              | 21%              |                    |
| Caesarian section                                      | 86%              | 79%              |                    |
| Anesthesia                                             |                  |                  | 0.65 <sup>2</sup>  |
| Epidural                                               | 71%              | 86%              |                    |
| General                                                | 14%              | 7%               |                    |
| Hypertension                                           | 21%              | 50%              | 0.12 <sup>2</sup>  |
| Diabetes                                               | 0%               | 14%              | 0.14 <sup>2</sup>  |
| Tobacco use                                            | 14%              | 29%              | 0.36 <sup>2</sup>  |
| Premature rupture of membranes*                        | 43%              | 14%              | 0.094 <sup>2</sup> |
| Amniotic fluid                                         |                  |                  | 0.3 <sup>2</sup>   |
| Clear                                                  | 71%              | 93%              |                    |
| Bloody                                                 | 21%              | 7%               |                    |
| Meconium                                               | 7%               | 0%               |                    |
| Antenatal steroids                                     | 86%              | 86%              | 1 <sup>2</sup>     |
| <b>Neonatal characteristics</b>                        |                  |                  |                    |
| Gestational age, median (quartiles)                    | 29 (28, 30)      | 28 (27, 31)      | 1 <sup>1</sup>     |
| Birth weight (grams), median (quartiles)               | 1240 (1035-1322) | 1262 (770, 1428) | 0.84 <sup>1</sup>  |
| Male                                                   | 50%              | 64%              | 0.45 <sup>2</sup>  |
| 5 minute Apgar score, median (quartiles)               | 8 (7, 8)         | 7 (6, 9)%        | 0.61 <sup>1</sup>  |
| Surfactant                                             | 43%              | 79%              | 0.053 <sup>2</sup> |
| Total days intubated                                   | 1 (0, 2)         | 4 (1, 11)        | 0.03 <sup>1</sup>  |
| Early onset bacteremia                                 | 0%               | 0%               | 1 <sup>2</sup>     |
| Late onset bacteremia                                  | 7%, n = 1        | 0%               | 0.31 <sup>2</sup>  |
| Antimicrobial exposure, days, median (quartiles)       | 5 (3, 9)         | 3 (2, 8)         | 0.31 <sup>1</sup>  |
| Age at feeding initiation (days), median (quartiles)   | 2 (2, 2)         | 2 (2, 3)         | 0.11 <sup>1</sup>  |
| Initial feeding type                                   |                  |                  | 1 <sup>1</sup>     |
| Expressed breast milk                                  | 64%              | 64%              |                    |
| Donor breast milk                                      | 31%              | 30%              |                    |
| Formula                                                | 0%               | 3%               |                    |
| Days to 100ml/kg/day enteral feeds, median (quartiles) | 10 (9, 18)       | 12 (9, 17)       | 0.72 <sup>1</sup>  |
| Type of feeds at discharge                             |                  |                  | 0.11 <sup>2</sup>  |
| Unfortified breast milk                                | 14%              | 0%               |                    |
| Fortified breast milk                                  | 36%              | 71%              |                    |
| Formula only                                           | 50%              | 29%              |                    |
| Necrotizing enterocolitis (≥stage 2)                   | 7%, n = 1        | 8%, n = 1        | 0.59 <sup>2</sup>  |
| Days to discharge, median (quartiles)                  | 49 (44, 60)      | 40 (29, 80)      | 0.23 <sup>1</sup>  |

<sup>1</sup>Wilcoxon rank test; <sup>2</sup>Pearson test, \* >18 hours prior to delivery
